# Supplementary material for: Claudin-17 Deficiency in Mice Results in Kidney Injury Due to Electrolyte Imbalance and Oxidative Stress
Source: MDPI journal article supplement (doi:10.3390/cells11111782), 2022-05-29
Supplement: s1 [file s1]

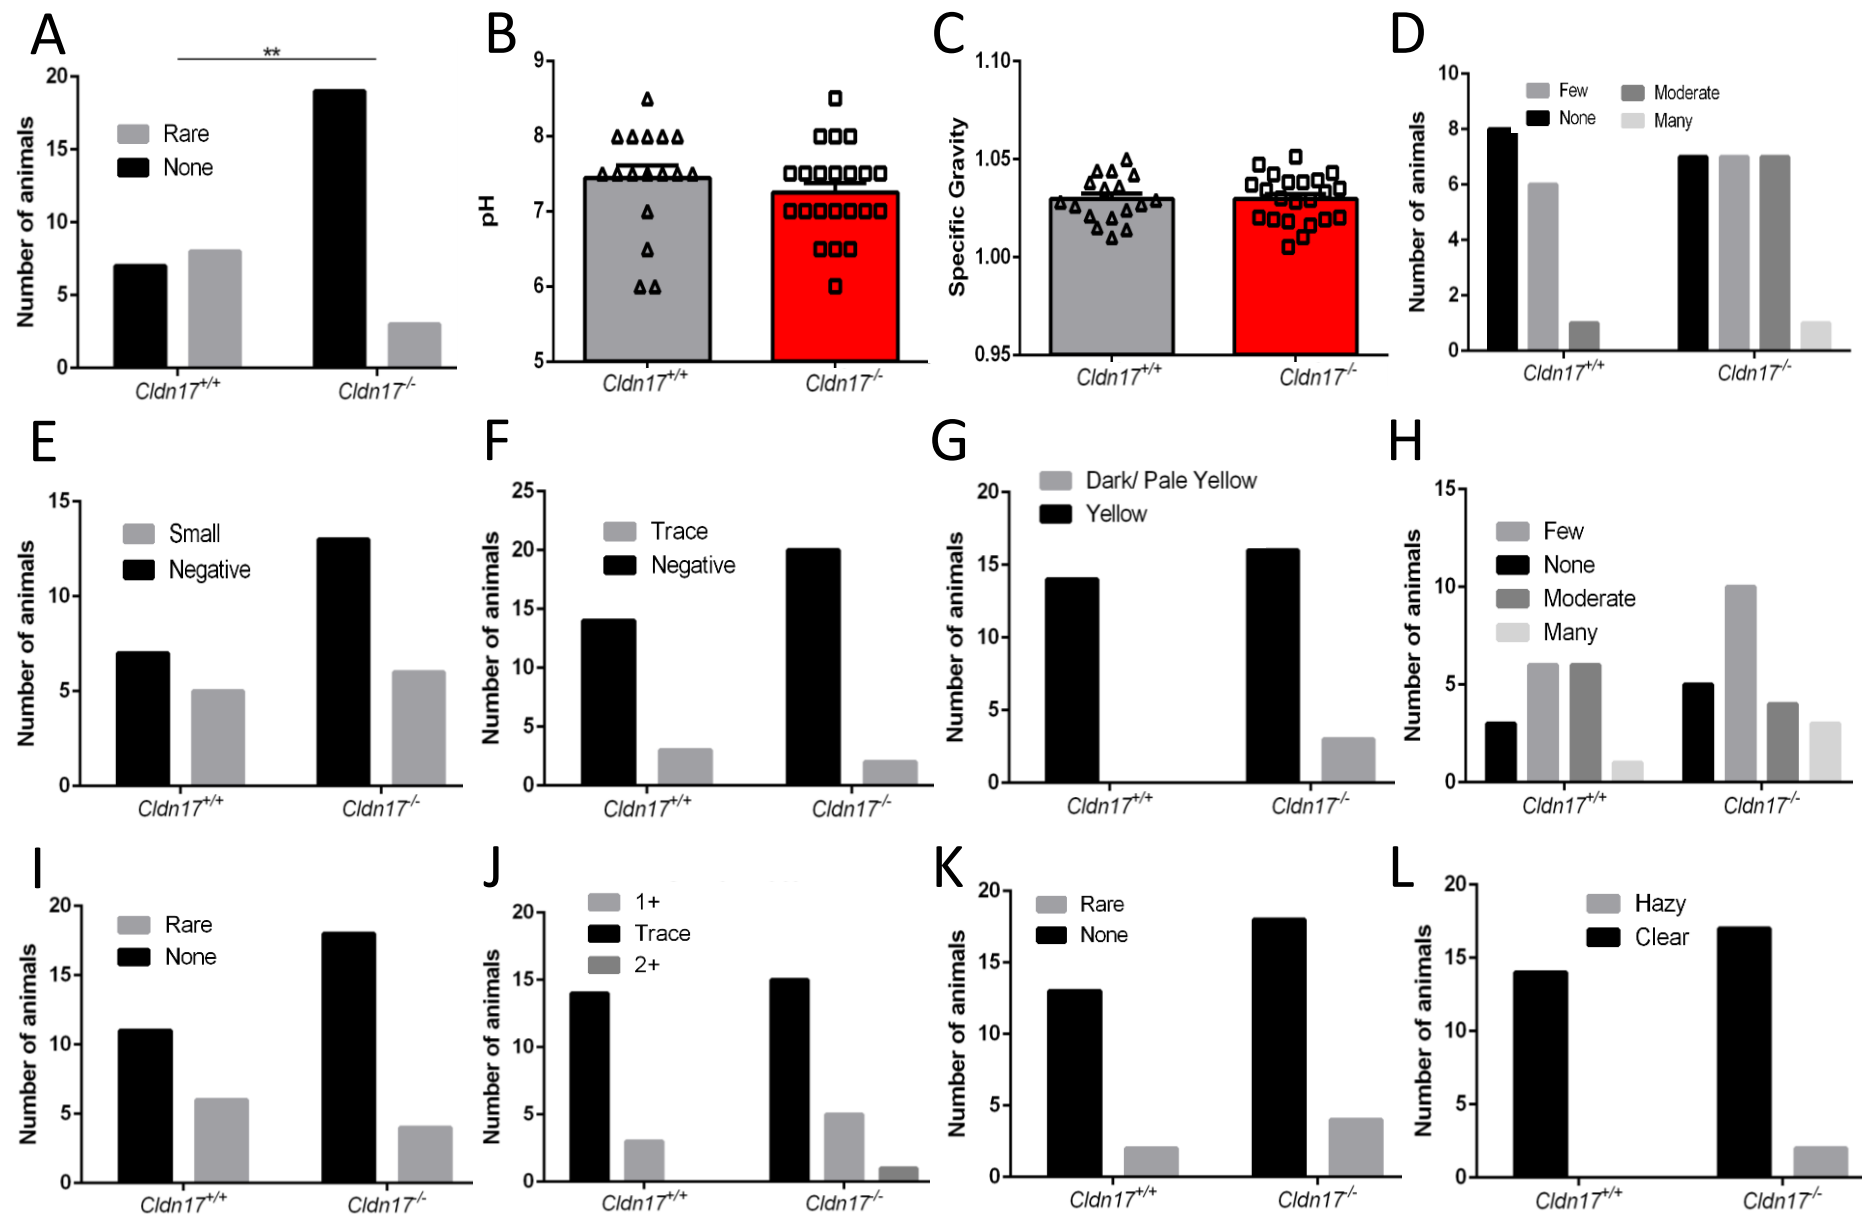

**Supplementary Figure S1. Urinalysis of samples from WT and *Cldn17* null animals.** Bar graphs showing changes in **A**. WBC (n=15-22), **B**. pH (n=17-22), **C**. Specific gravity (n=17-22), **D**. Bacteria (n=15-22), **E**. Bilirubin (n=12-19), **F**. Blood (n=17-22), **G**. Color (n=14-19), **H**. Crystals (n=16-22), **I**. Epithelial cells (n=17-22), **J**. Protein (n=14-19), **K**. RBC (n=15-22), **L**. Turbidity (n=14-19) in mouse urine. \*\*p<0.01.

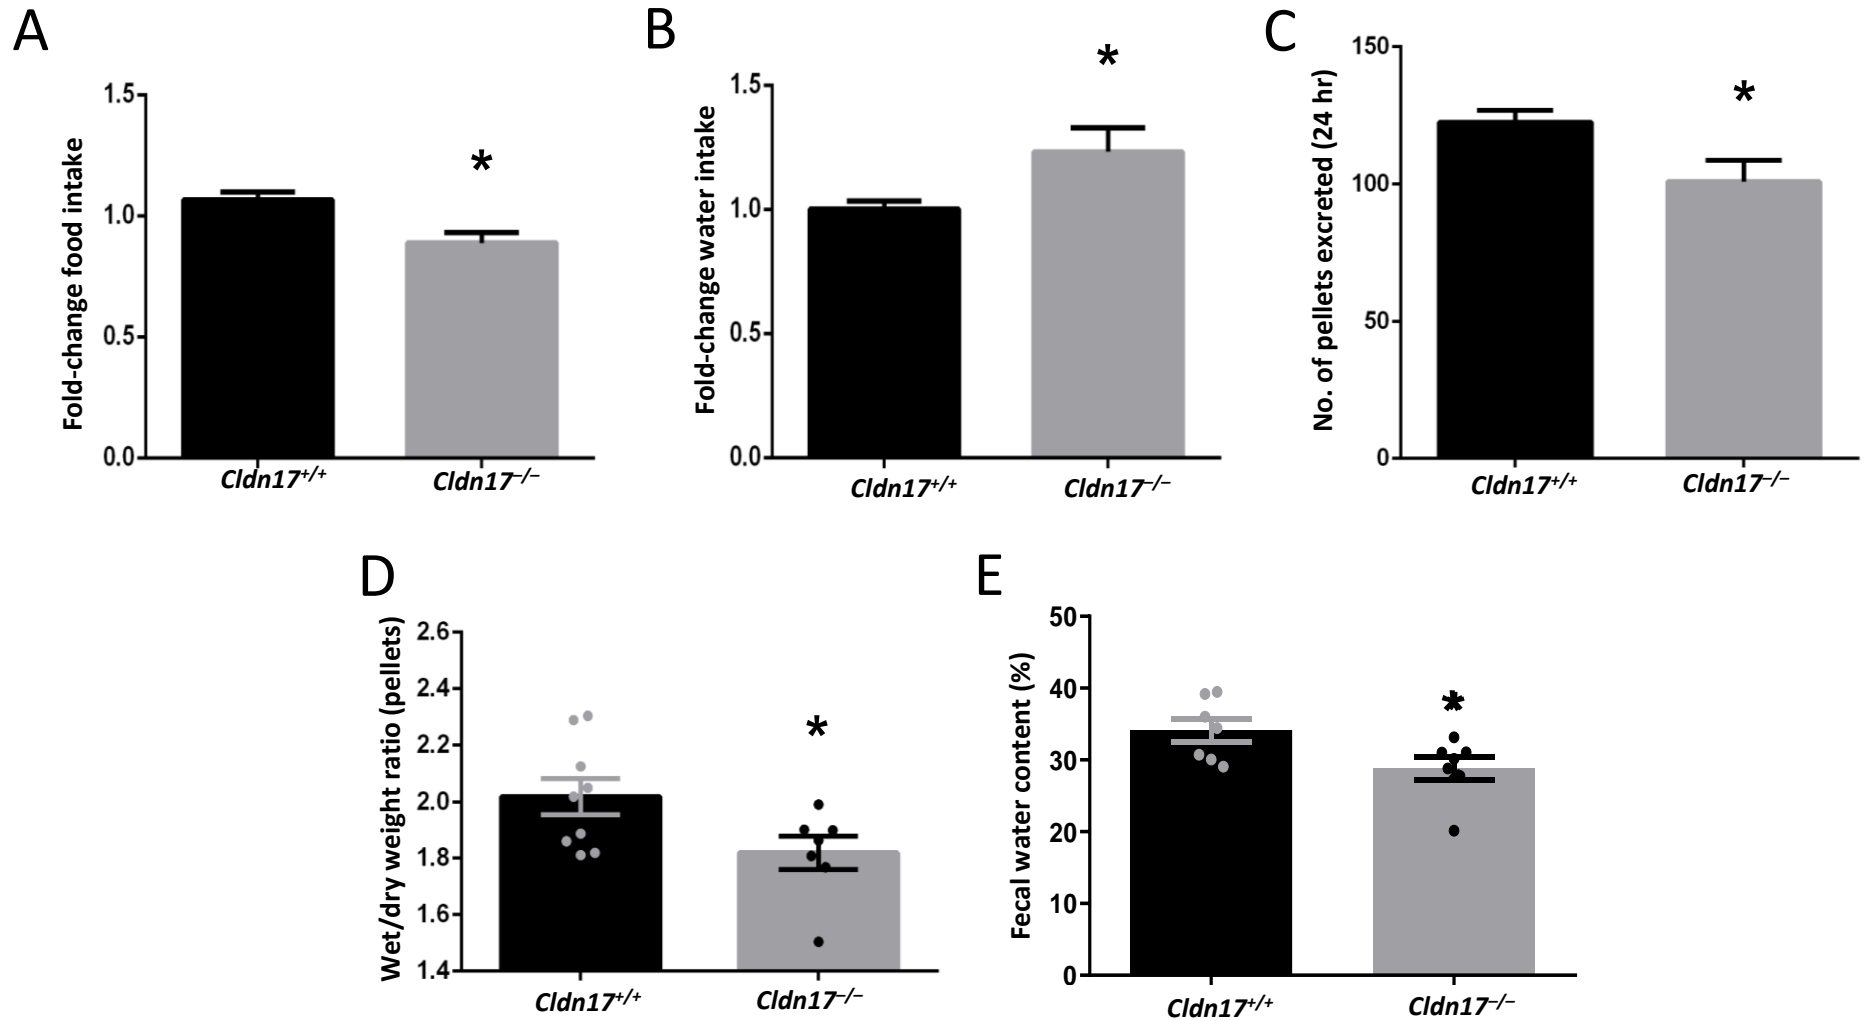

**Supplementary FigureS2. Effect of *Cldn17* loss in mice on water balance.** **A** Fold-change food (n=8) and **B** Fold-change water (n=9) consumption in WT and *Cldn17*<sup>-/-</sup> mice. **C** Fecal pellets excreted over 24 hours (n=4 cages, 2-4 mice per cage) from WT and *Cldn17*<sup>-/-</sup> mice. **D** Wet/dry ratio of fecal pellets demonstrating the moisture content (n=7-9). **E** Water content in the fecal pellets from WT and *Cldn17*<sup>-/-</sup> mice (n=7). Data presented as mean ± s.e.m.; \**p*<0.05.

A

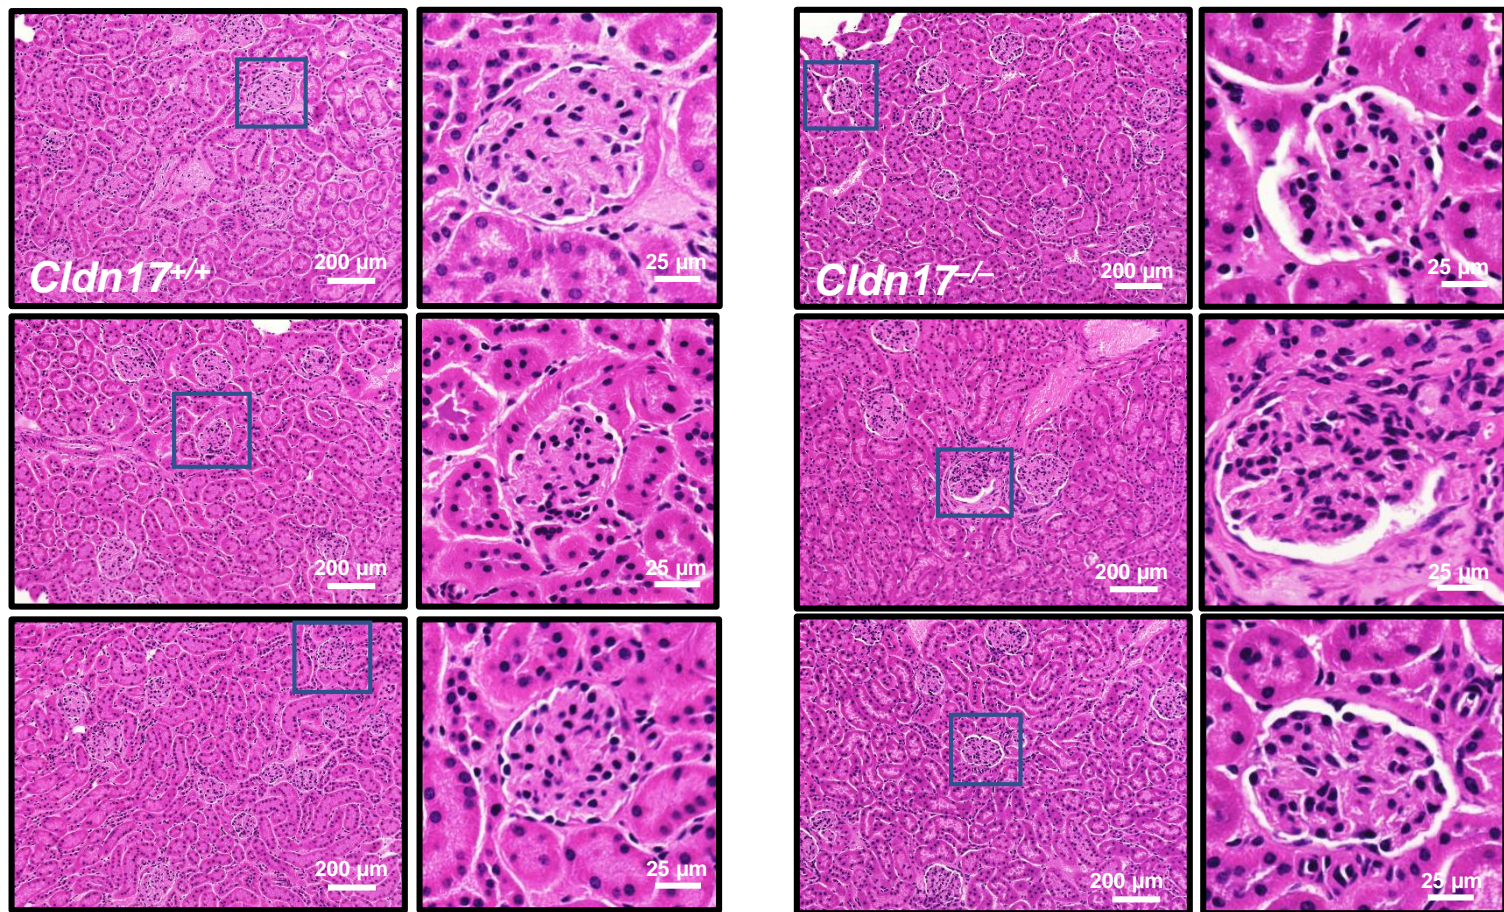

B

| Injury scores (average values of 3 fields/mouse) |                              |                              |                              |
|--------------------------------------------------|------------------------------|------------------------------|------------------------------|
|                                                  | <i>Cldn17</i> <sup>+/+</sup> | <i>Cldn17</i> <sup>+/-</sup> | <i>Cldn17</i> <sup>-/-</sup> |
| n1                                               | 2                            | 2.5                          | 3                            |
| n2                                               | 1                            | 1                            | 3                            |
| n3                                               | 2                            | 2                            | 3                            |
| <b>Average</b>                                   | 1.666666667                  | 1.833333333                  | 3                            |

C

| Bowman's capsule area (average values of 3 fields/mouse) |                              |                              |                              |
|----------------------------------------------------------|------------------------------|------------------------------|------------------------------|
|                                                          | <i>Cldn17</i> <sup>+/+</sup> | <i>Cldn17</i> <sup>+/-</sup> | <i>Cldn17</i> <sup>-/-</sup> |
| n1                                                       | 2.094                        | 3.767667                     | 4.279                        |
| n2                                                       | 1.101667                     | 3.079667                     | 4.082667                     |
| n3                                                       | 1.685667                     | 2.443                        | 3.897                        |
| <b>Average</b>                                           | 1.627111                     | 3.096778                     | 4.086222                     |

**Supplementary Figure S3.** *Cldn17*<sup>-/-</sup> mice display kidney injury. **(A)** Hematoxylin and eosin-stained images of kidneys with magnified Bowman's capsule area from WT and *Cldn17*<sup>-/-</sup> mice. **(B)** Table showing kidney injury scores determined by blinded reviewers (Average of 3 random fields each sample; n=3). **(C)** Table showing quantification of Bowman's capsule area by Image J software (Average of 3 random fields each sample; n=3).



A

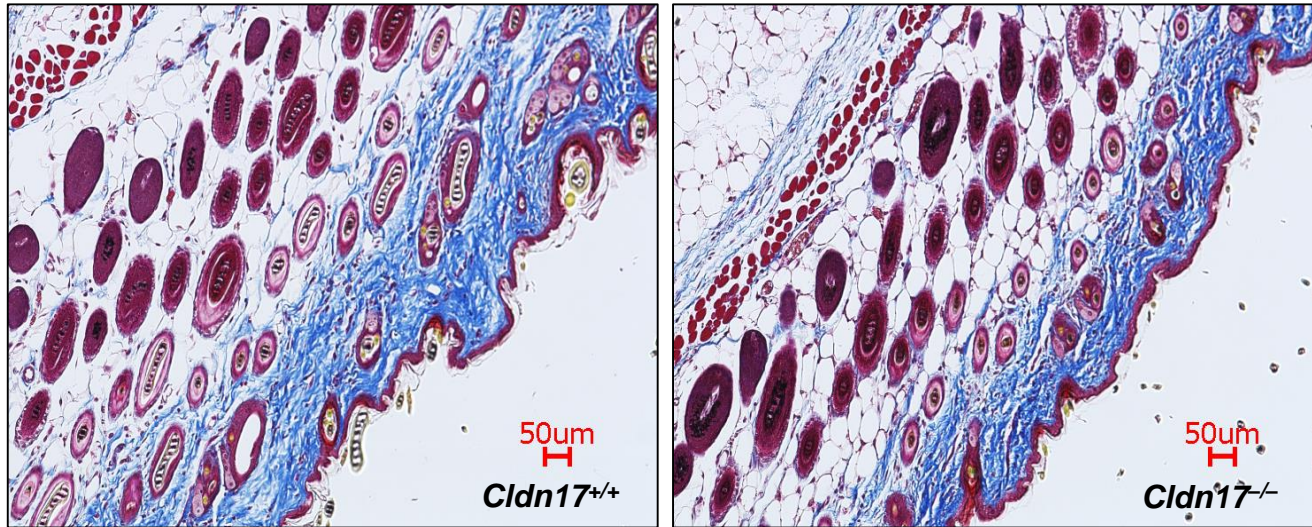

B

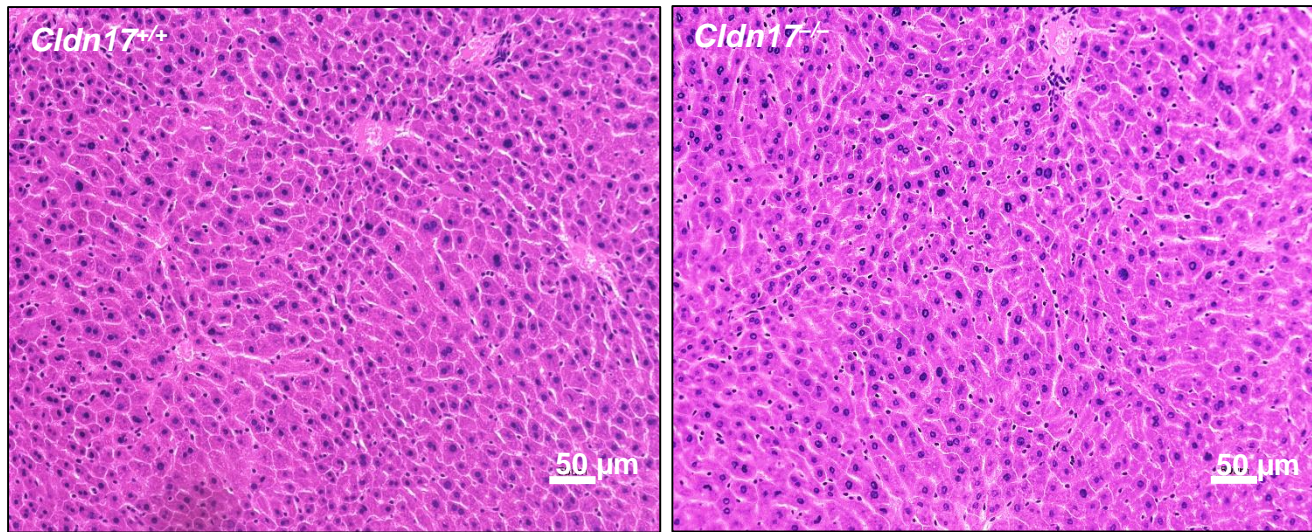

**Supplementary Figure S4. Effect of *Cldn17* loss on skin and liver. A. Masson's trichrome-stained skin images. B. H&E-stained liver images.**

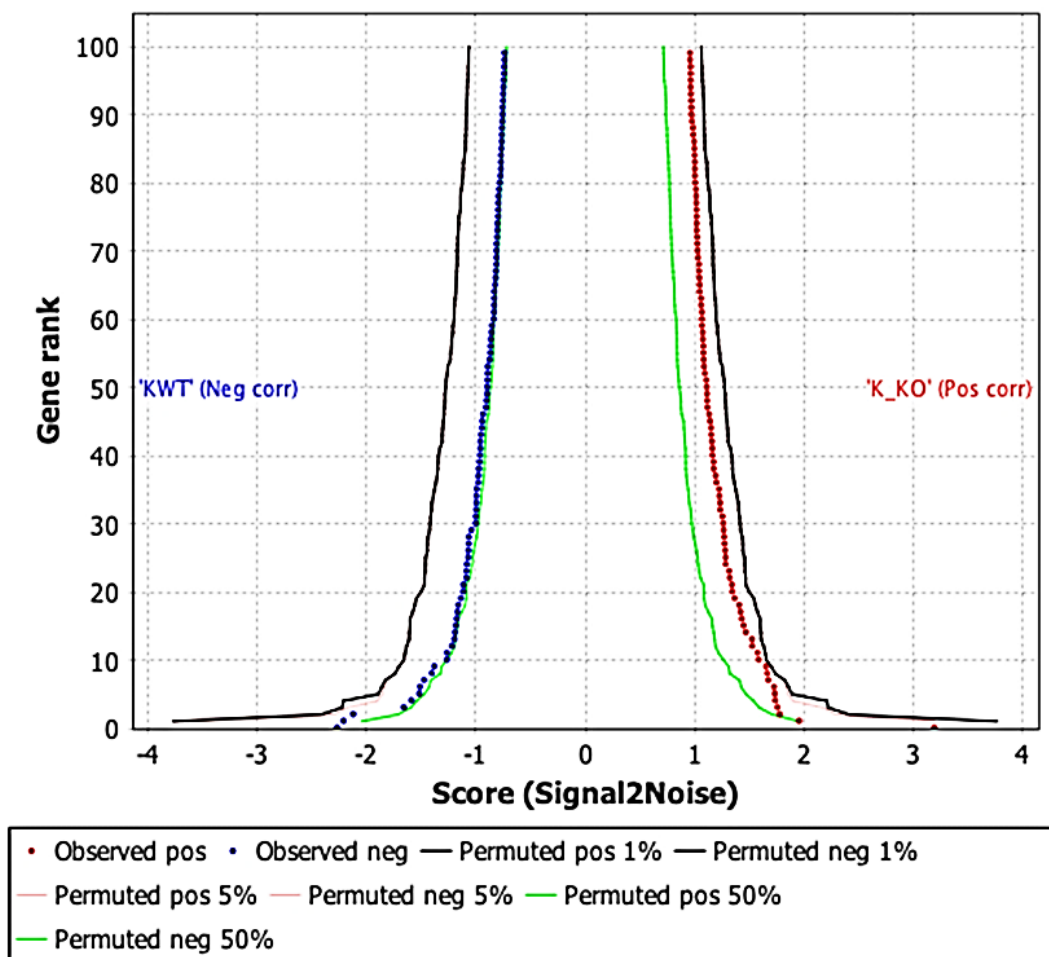

**Supplementary Figure S5.** The butterfly plot for modulated genes in WTs and Cldn17 knockout groups. Significantly altered genes are represented in red whereas rest of the genes are depicted in green. X-axis signifies fold-changes with upregulation in positive and downregulation in negative values.  $n=3$ ;  $p<0.05$ .





| Primer Set    | Sequence – 5' - 3'   |
|---------------|----------------------|
| Cldn17 Cel1 F | AGAAGACCAGGCACTCCTCT |
| Cldn17 Cel1 R | TCATGCCGCAGATGCCAATA |

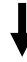

**Preparation of a PCR reaction with the following reaction components:**

| Reaction components                    | Volume (μl) | Final concentration |
|----------------------------------------|-------------|---------------------|
| DNA template                           | 1           | --                  |
| 10 μM Primer Cel-1 F                   | 5           | 1 μM                |
| 10 μM Primer Cel-1 R                   | 5           | 1 μM                |
| Sigma JumpStart™ Taq ReadyMix™ (P2893) | 25          | 1X                  |
| ddH <sub>2</sub> O                     | 14          | --                  |
| 50 μl reaction                         |             |                     |

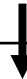

**PCR cycling conditions:**

| Cycle Step | Temp (°C) | Time   |               |
|------------|-----------|--------|---------------|
| 1          | 95        | 2 min  |               |
| 2          | 95        | 30 sec | } x 35 cycles |
| 3          | 60        | 30 sec |               |
| 4          | 68        | 40 sec |               |
| 5          | 68        | 5 min  |               |
| 6          | 4         | ∞      |               |

**\*\*PCR products should be treated with Exo-SAP and sent directly to sequencing. SAP will work to dephosphorylate any residual primers and dNTPs (from the PCR) and ExoI will degrade the single stranded molecules so that the DNA can be used directly for sequencing with the specific sequencing primer.**

Resolve PCR product on a 1.5% agarose gel.  
Expected wildtype band = 408bp

**Supplementary Figure S7:** Identification of wild-type, heterozygote, and homozygote animals with small deletions (1bp-200bp)

**Supplementary Table S1. No changes in the expression of vasopressin genes in the kidneys of *Cldn17*<sup>-/-</sup> mice (n=3)**

| Gene Name     | <i>Cldn17</i> <sup>+/+</sup> | <i>Cldn17</i> <sup>-/-</sup> | log2 (fold change) | p-value |
|---------------|------------------------------|------------------------------|--------------------|---------|
| <b>Avpi1</b>  | 17.9509                      | 16.201                       | -0.14798           | 0.5464  |
| <b>Avpr2</b>  | 5.56332                      | 6.95275                      | 0.321637           | 0.3123  |
| <b>Avpr1a</b> | 5.45037                      | 5.70565                      | 0.066038           | 0.78925 |

**Supplementary Table S2. No changes in the expression of Angiotensin genes in the kidneys of *Cldn17*<sup>-/-</sup> mice (n=3)**

| Gene Name     | <i>Cldn17</i> <sup>+/+</sup> | <i>Cldn17</i> <sup>-/-</sup> | log2 (fold change) | p-value |
|---------------|------------------------------|------------------------------|--------------------|---------|
| <b>Agtr1a</b> | 8.30817                      | 7.6259                       | -0.12362           | 0.50175 |
| <b>Agtrap</b> | 20.5049                      | 18.0406                      | -0.18472           | 0.14475 |
| <b>Arrb1</b>  | 67.8613                      | 67.1582                      | -0.01503           | 0.9055  |
| <b>Arrb2</b>  | 13.9833                      | 16.2582                      | 0.217469           | 0.1628  |
| <b>Ace</b>    | 259.306                      | 255.746                      | -0.01994           | 0.89205 |



**Supplementary Table S3. RT-PCR Primers for mouse Claudins**

| <b>Gene</b>                     | <b>Forward Primer sequence (5'- 3')</b> | <b>Reverse Primer sequence (5'- 3')</b> |
|---------------------------------|-----------------------------------------|-----------------------------------------|
| <b>Cldn1</b>                    | GATGTGGATGGCTGTCATTG                    | CGTGGTGTTGGGTAAGAGGT                    |
| <b>Cldn2</b>                    | ATGGTGACGTCCAGTGCAAT                    | GGCGAGTAGAAGTCCCGAAG                    |
| <b>Cldn3</b>                    | GAGATGGGAGCTGGGTTGTA                    | GTAGTCCTTGCGGTCGTAGG                    |
| <b>Cldn4</b>                    | CCCGAGCCCTTATGGTCATC                    | GAGTAGGGCTTGTCGTTGCT                    |
| <b>Cldn5</b>                    | CTGGACCACAACATCGTGAC                    | GCCGGTCCAGGTAACAAAGA                    |
| <b>Cldn6</b>                    | GAGCCAAGTGCACTACCTGT                    | TGGTGGGATATTCGGAGGGT                    |
| <b>Cldn7</b>                    | GCGACAACATCATCACAGCC                    | TACCAAGGCAGCAAGACCTG                    |
| <b>Cldn8</b>                    | TTGCTGACAGCCGGAATCAT                    | TCGGAGATCTCTTTTCGGCG                    |
| <b>Cldn9</b>                    | CCAAGGCCCGTATCGTACTC                    | GGACACGTACAGCAGAGGAG                    |
| <b>Cldn10</b>                   | GCTAAAATTGCTTGCTTGGC                    | TCCGTTGTATGTGTAGCCCA                    |
| <b>Cldn11</b>                   | TAGCCACTTGCCTTCAGGTG                    | GAGCAGCAGACGATGACACA                    |
| <b>Cldn12</b>                   | AACTGGCCAAGTGTCTGGTC                    | AGACCCCTGAGCTAGCAAT                     |
| <b>Cldn13</b>                   | CCCTGTCCTGGGTAACACAC                    | GGCTCCTGAAGGTCTAGCAC                    |
| <b>Cldn14</b>                   | GCACAGGCATCTACCAGTGT                    | TGAGGAGATGAAGCCCAGGT                    |
| <b>Cldn15</b>                   | TGTCTACGGTCCATGGCAAC                    | CCACGAGATAGCCACCATCC                    |
| <b>Cldn16</b>                   | CCTGCGATGAGTACGACTCC                    | CTCCTGCCAAAAGCAACCC                     |
| <b>Cldn17</b>                   | TCTCCCTCCGGTACTGGAAG                    | GCTCCTCCAAGTTCTCGCTT                    |
| <b>Cldn18</b>                   | GTGTCCATCTTCGCCCTGAA                    | GGTGTACCTGGTCTGAACGG                    |
| <b>Cldn19</b>                   | TTCTTCAACCCAGCACTCC                     | GCGGGCAACTTAACAACAGG                    |
| <b>Cldn20</b>                   | CTTTCATCCTGGCCGTGTCT                    | GGCTTTCCGGAATGGTCAGA                    |
| <b><math>\beta</math>-Actin</b> | TTTGAGACCTTCAACACCCC                    | ATAGCTCTTCTCCAGGGAGG                    |
| <b>GAPDH</b>                    | CATCACTGCCACCCAGAAGACTG                 | ATGCCAGTGAGCTTCCCGTTTCAG                |
